# Supplementary material
Source: PubMed Central journal article supplement (PMC2733522)

## Supplemental Materials for JBIC-08-11-00191 Byrne and Mason:

Maximum fluorescence emission from Fe<sub>2</sub> hTF, Fe<sub>N</sub> hTF, Fe<sub>C</sub> hTF, Lock<sub>C</sub> hTF and Lock<sub>N</sub> hTF at pH 7.4 (100 mM HEPES) and pH 6.4-5.6 (100 mM MES, 300 mM KCl, 4 mM EDTA). All samples were incubated at least 15 minutes to try to assure complete iron removal. Samples were excited at 280 nm and emission was monitored between 300-400 nm using a 320 nm cut-on filter.

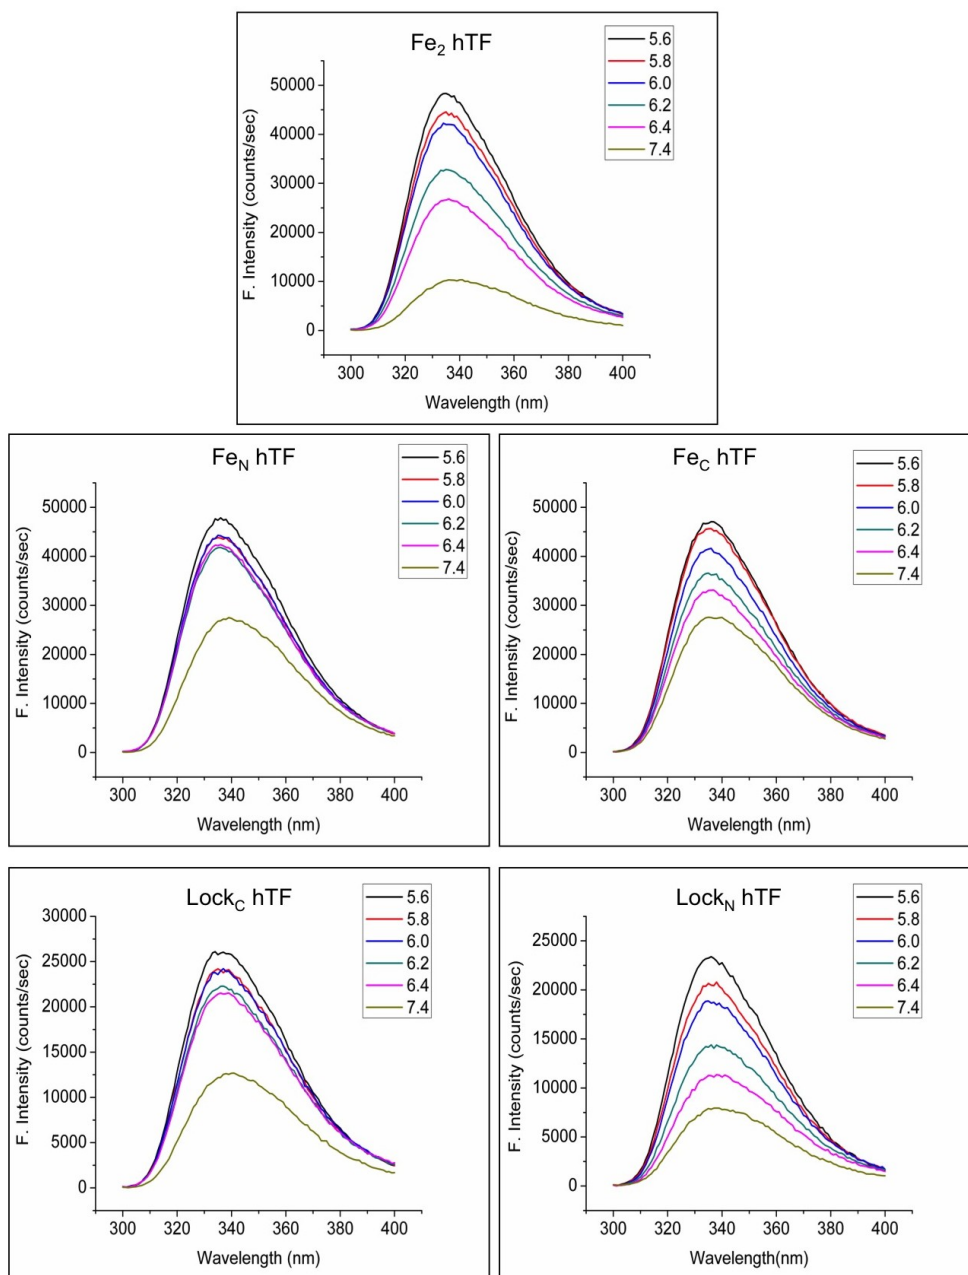

Supplement: NIHMS116664-supplement-ByrneSupplement.pdf [file NIHMS116664-supplement-ByrneSupplement.pdf]
